# Supplementary material for: BarkBase: Epigenomic Annotation of Canine Genomes
Source: MDPI journal article supplement (doi:10.3390/genes10060433), 2019-06-07
Supplement: s1 [file s1]

**Table S8:** Human genes overlapped by novel BarkBase transcripts. Fifteen transcripts in the BarkBase RNA-seq data which did not overlap any annotation in Ensembl or Hoeppner *et al* overlapped five human genes in the UCSC Other RefSeq track.

| RefSeq accession | Gene name     | Gene description         | Annotation                                  |
|------------------|---------------|--------------------------|---------------------------------------------|
| NM_000502        | <i>EPX</i>    | eosinophil peroxidase    | No                                          |
| NM_000523        | <i>HOXD13</i> | homeobox D13             | No                                          |
| NM_003154        | <i>STATH</i>  | statherin                | No                                          |
| NM_001160264     | <i>FEZF1</i>  | FEZ family zinc finger 1 | No                                          |
| NM_001350929     | <i>AHNAK2</i> | AHNAK nucleoprotein 2    | Yes, non-unique alignment, additional exons |
